# Supplementary material for: Oral tolerance to systemic vaccination remains intact without RORγt expression in regulatory T cells
Source: PubMed Central journal article supplement — iScience. 2023 Nov 22;26(12):108504. doi: 10.1016/j.isci.2023.108504 (PMC10730369; doi:10.1016/j.isci.2023.108504), 2023-11-22
Supplement: mmc1.pdf [file mmc1.pdf]

**Supplemental information**

**Oral tolerance to systemic vaccination**

**remains intact without ROR $\gamma$ t**

**expression in regulatory T cells**

**Nicole B. Potchen, Andrew M.F. Johnson, Kevin Hager, Jessica Graham, Phuong Van, Katelyn H. Lyn-Kew, Lakshmi Warriar, Irene Cruz Talavera, Jennifer M. Lund, and James G. Kublin**

# Figure S1

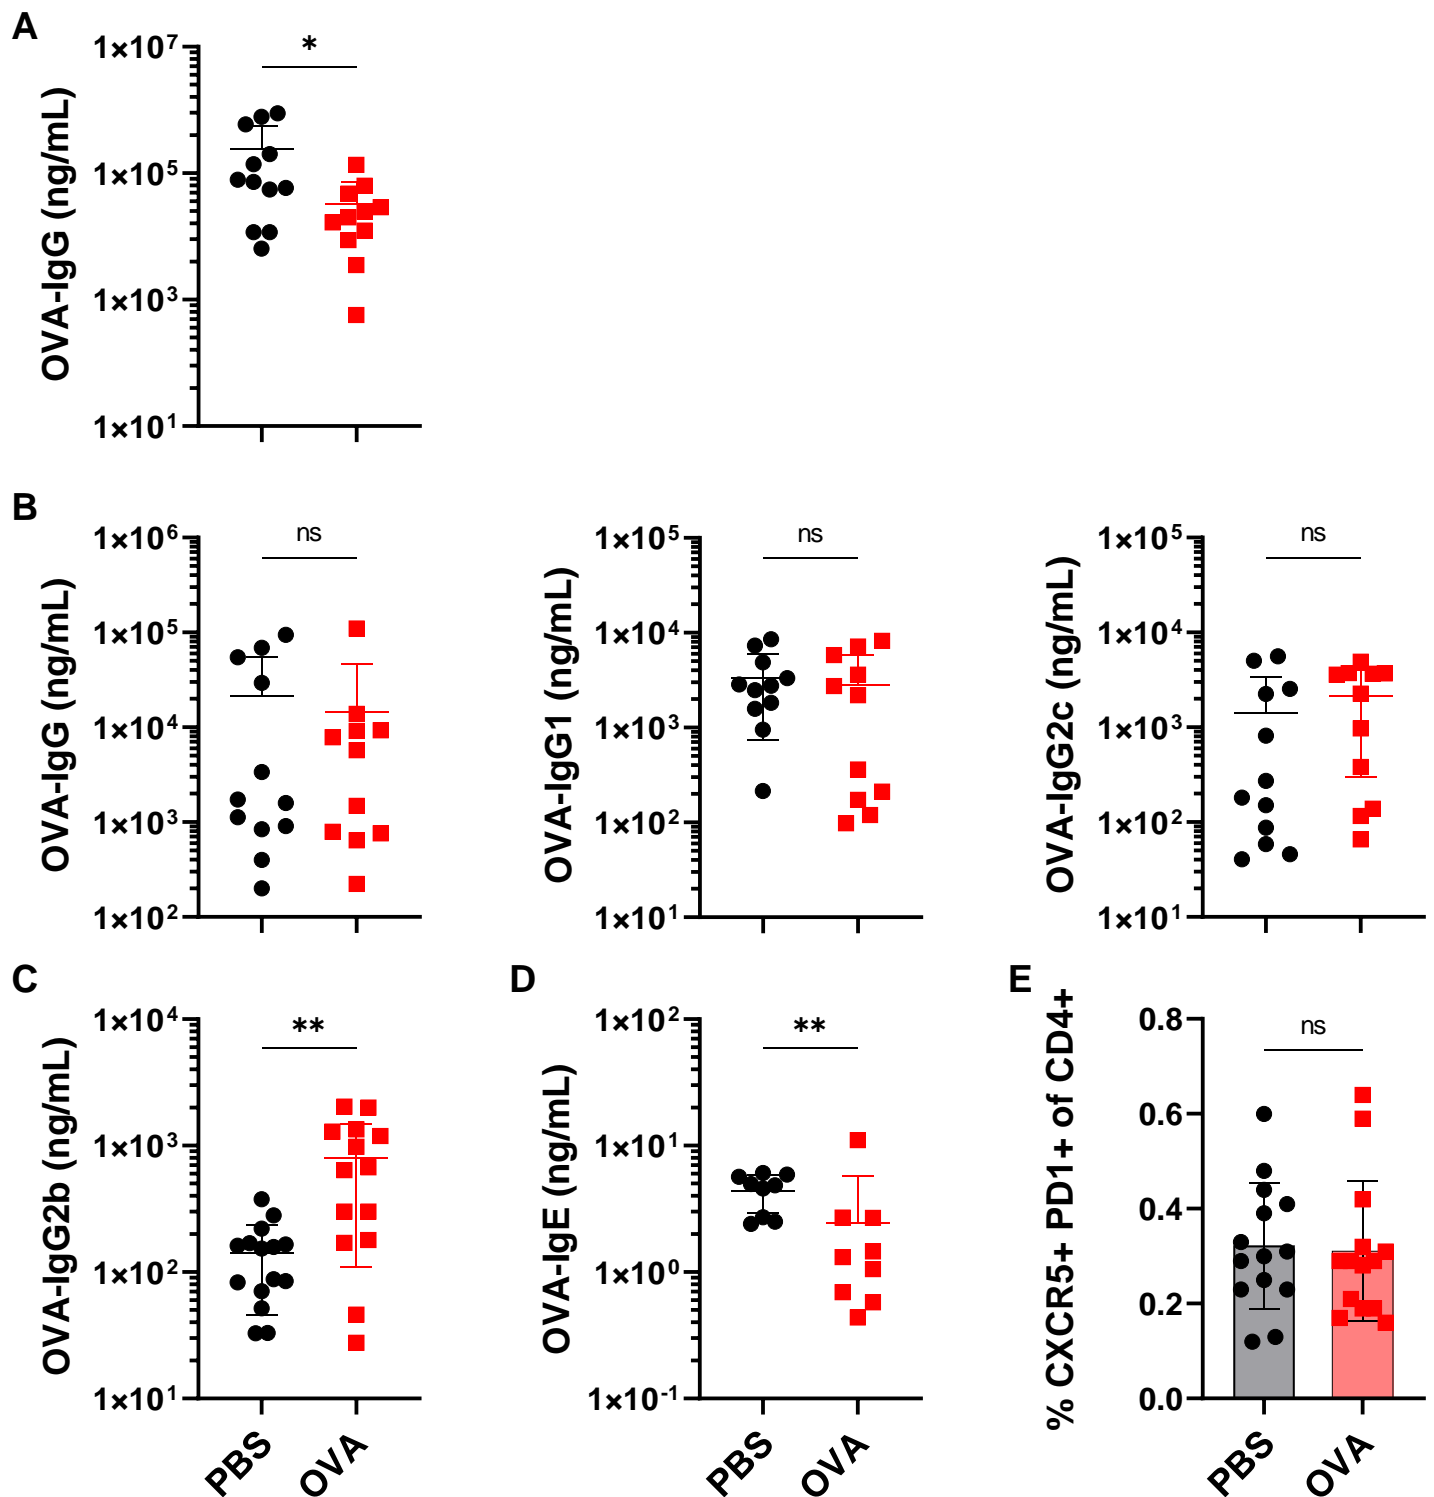

**Figure S1 – Oral administration of antigen prior to vaccination with alum: IgG, Day 14, other isotypes, and T-follicular helper cells. Related to Figure 1.**

Analysis of antibody titers and cellular responses for experiments described in Figure 1. **A)** Endpoint OVA-IgG titers. **B)** OVA-IgG, IgG1 and IgG2c at Day 14 following immunization after oral antigen pre-exposure. **C)** Endpoint OVA-IgG2b titers. **D)** Endpoint OVA-IgE titers. **E)** T<sub>FH</sub> cells from spleens of mice, pre-gated on lymphocytes, singlets, live, CD3+, CD45+, CD4+, CD8- prior to CXCR5+ PD-1 gating (representative plot in Fig. S7). Data pooled from 3 independent experiments. Unpaired t tests were used for statistical analysis.

# Figure S2

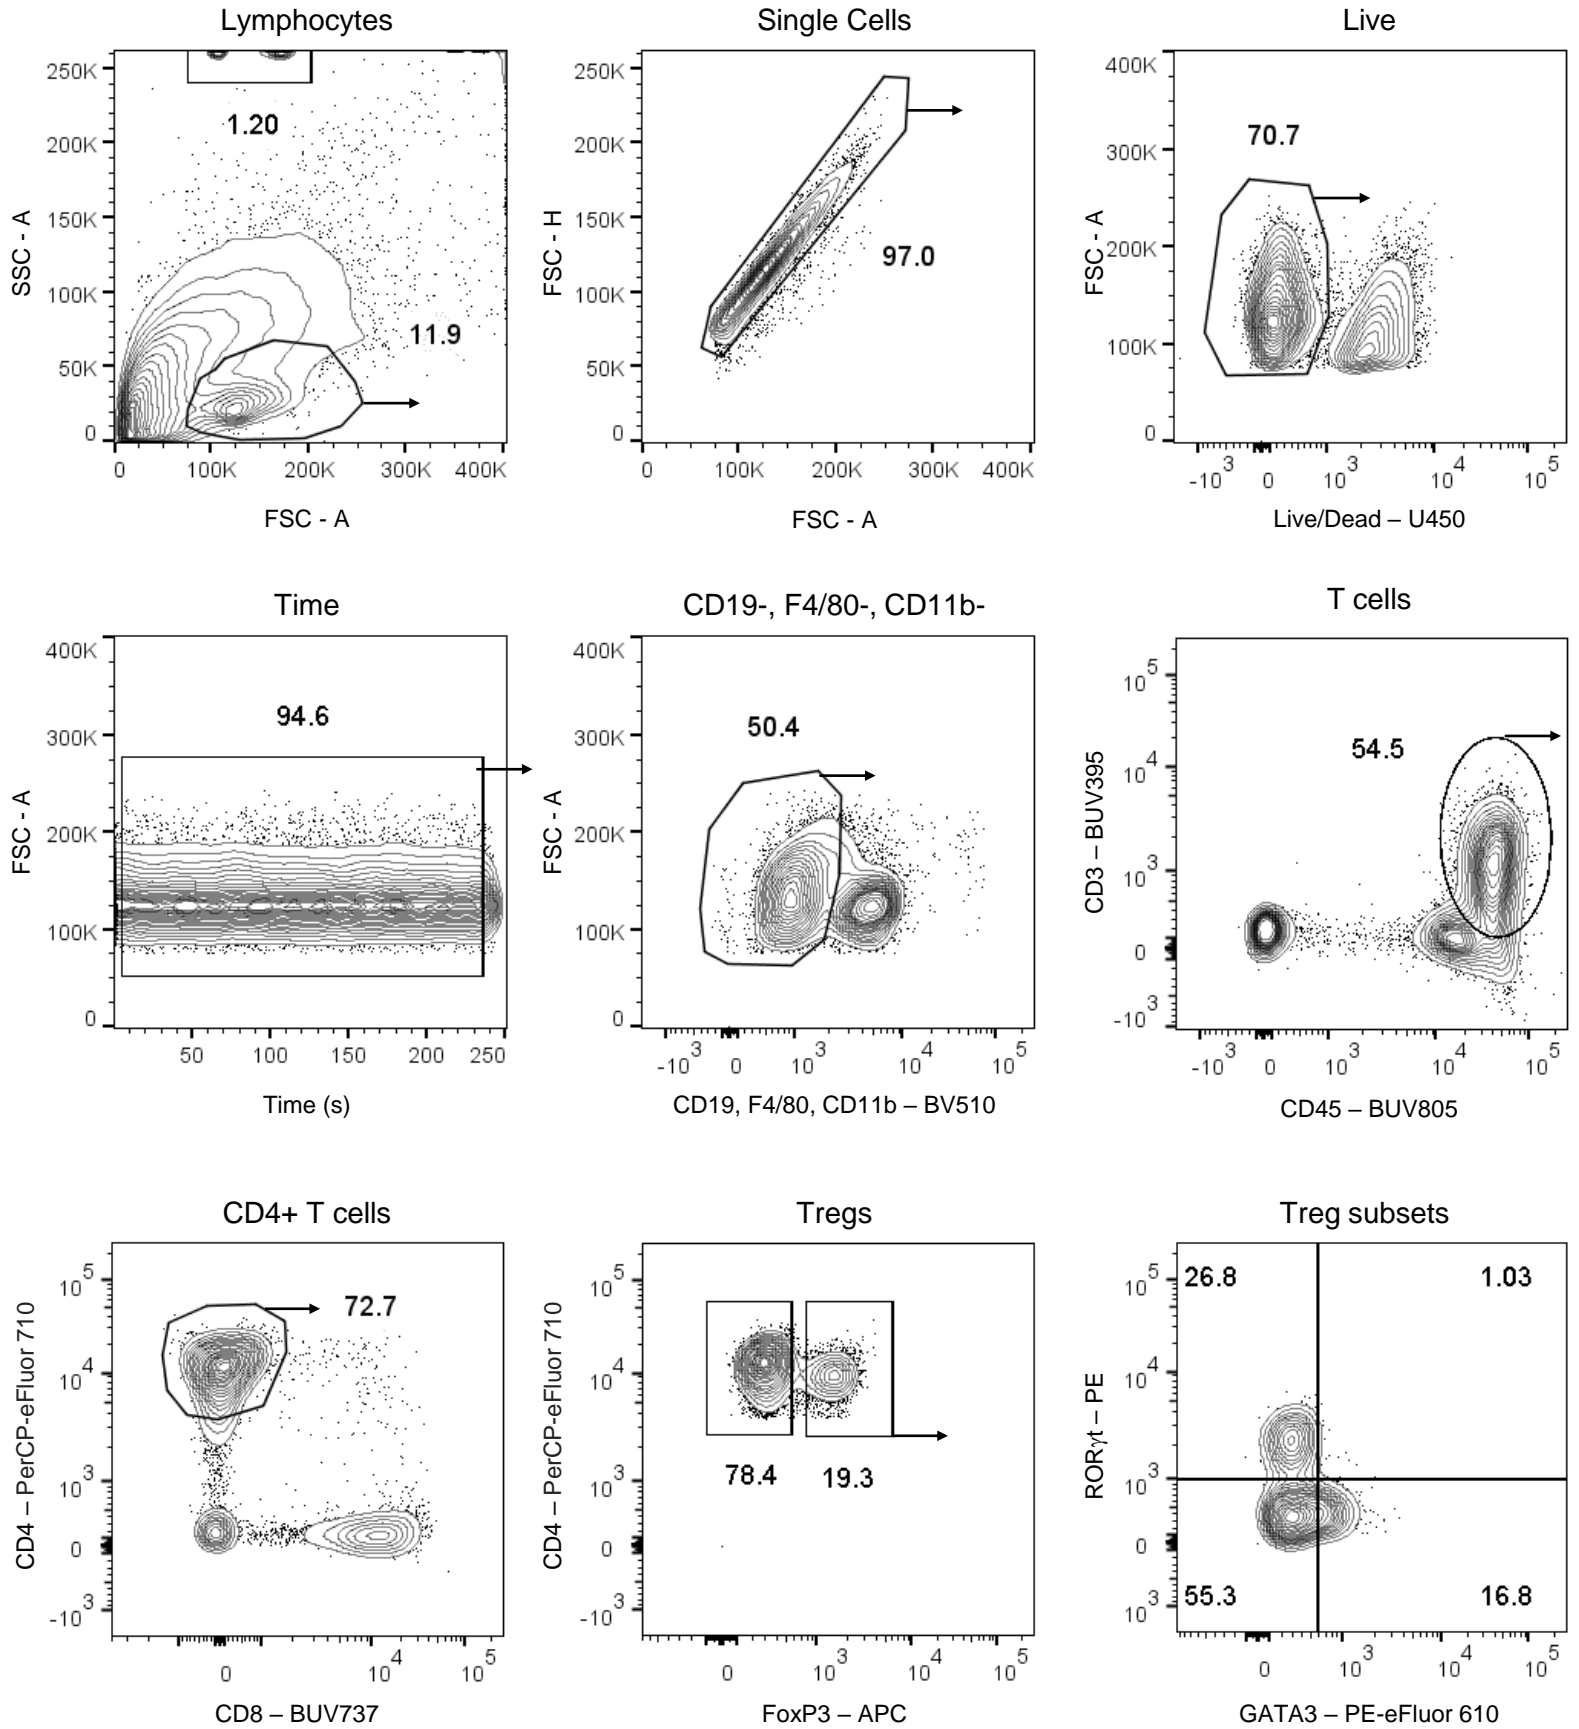

**Figure S2 – Flow cytometry gating. Related to Figure 1.**

Gating strategy used to identify CD4+ T cells and FoxP3+ Treg subsets. Beads to assess total cell counts are also gated in the first panel (FSC-A v SSC-A).

# Figure S3

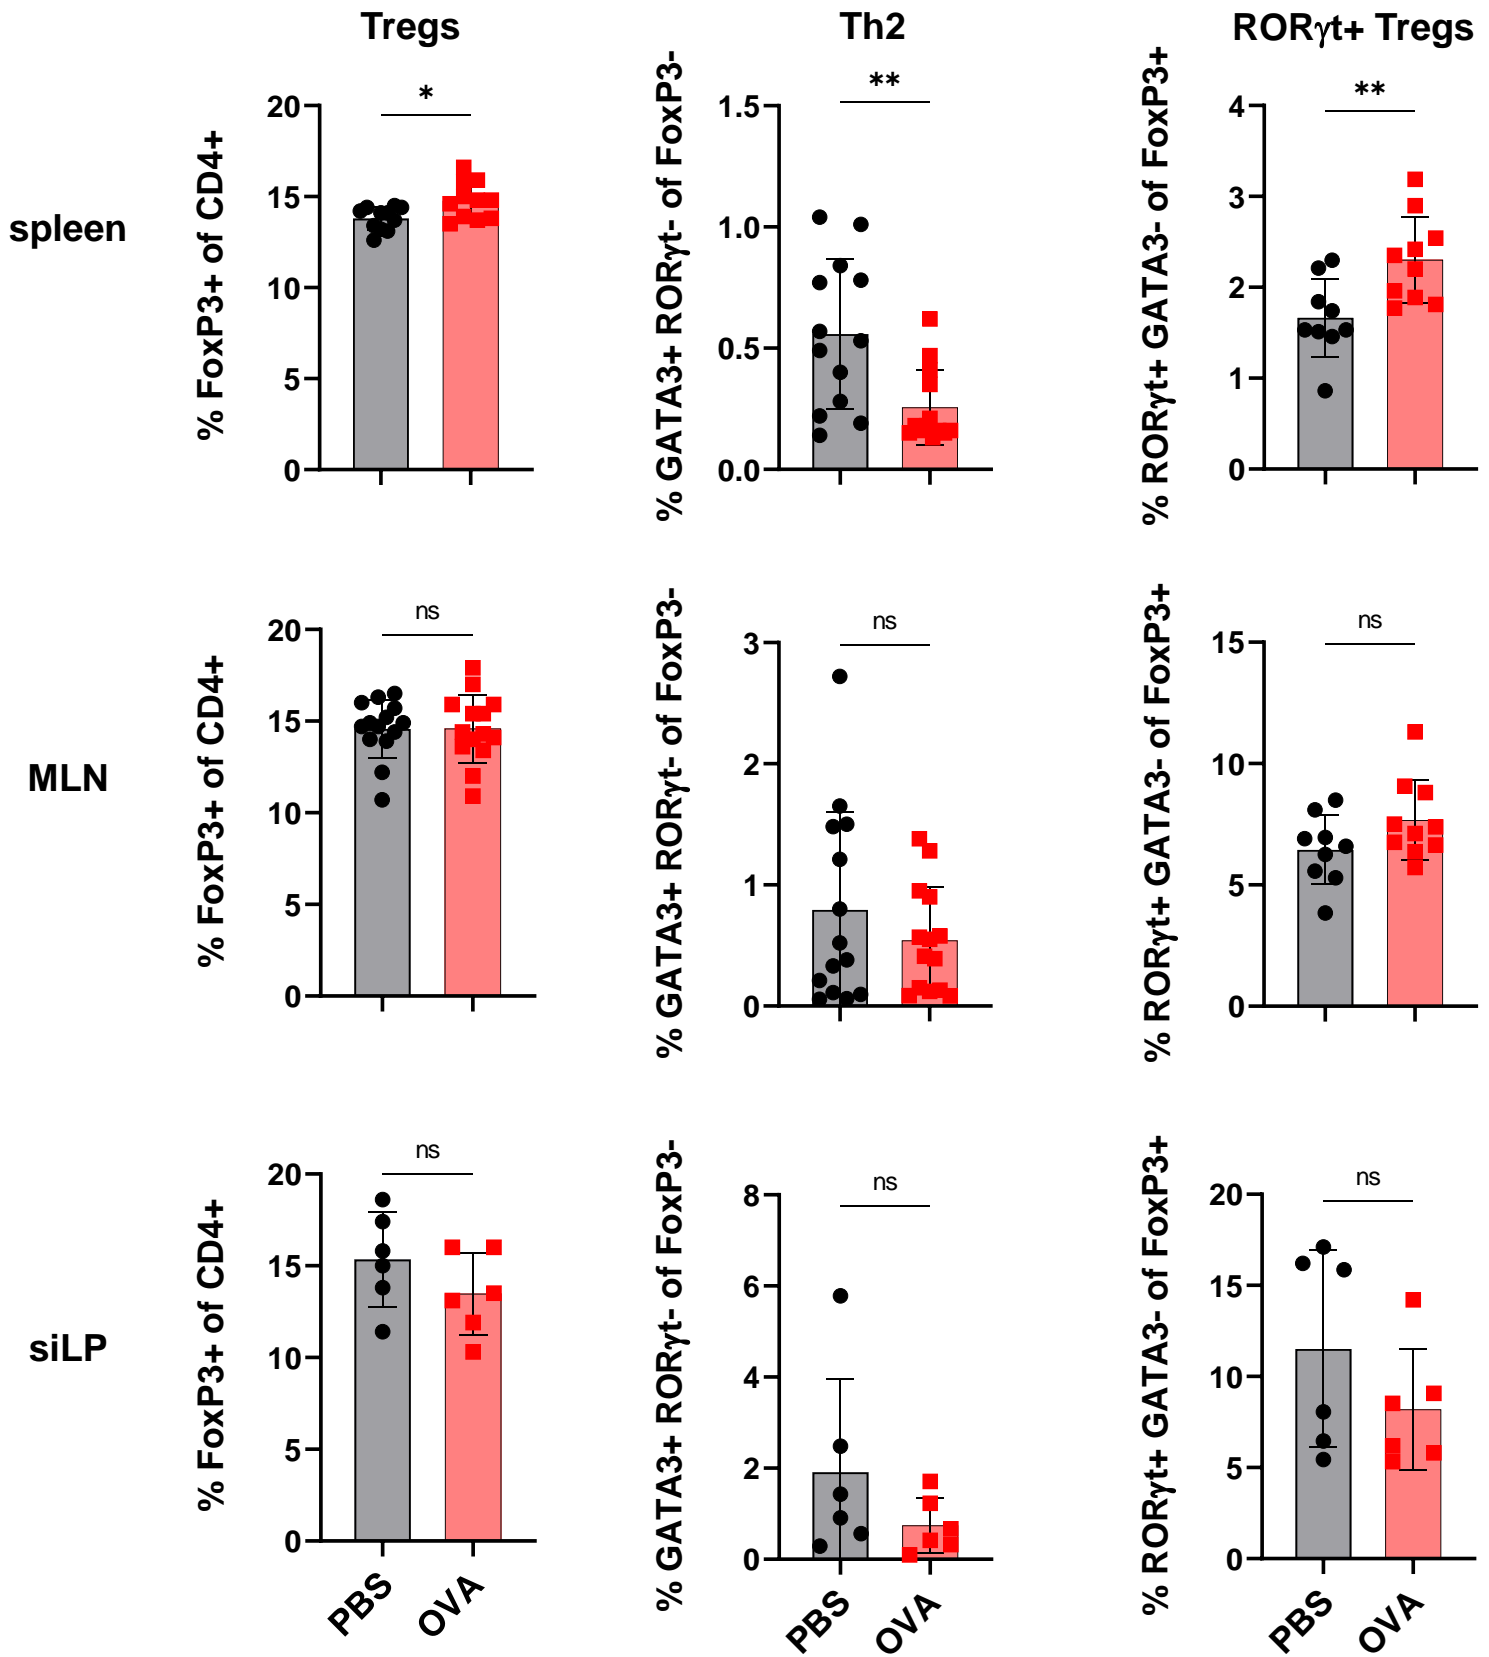

Figure S3 – Oral exposure to antigen prior to vaccination with alum: CD4+ responses. Related to Figure 1.

CD4+ frequencies of indicated subset in spleen, MLN, and siLP for experiment defined in Figure 1A. Gated using strategy outlined in Fig. S2. Data pooled from 3 independent experiments. Unpaired t tests were used for statistical analysis.

# Figure S4

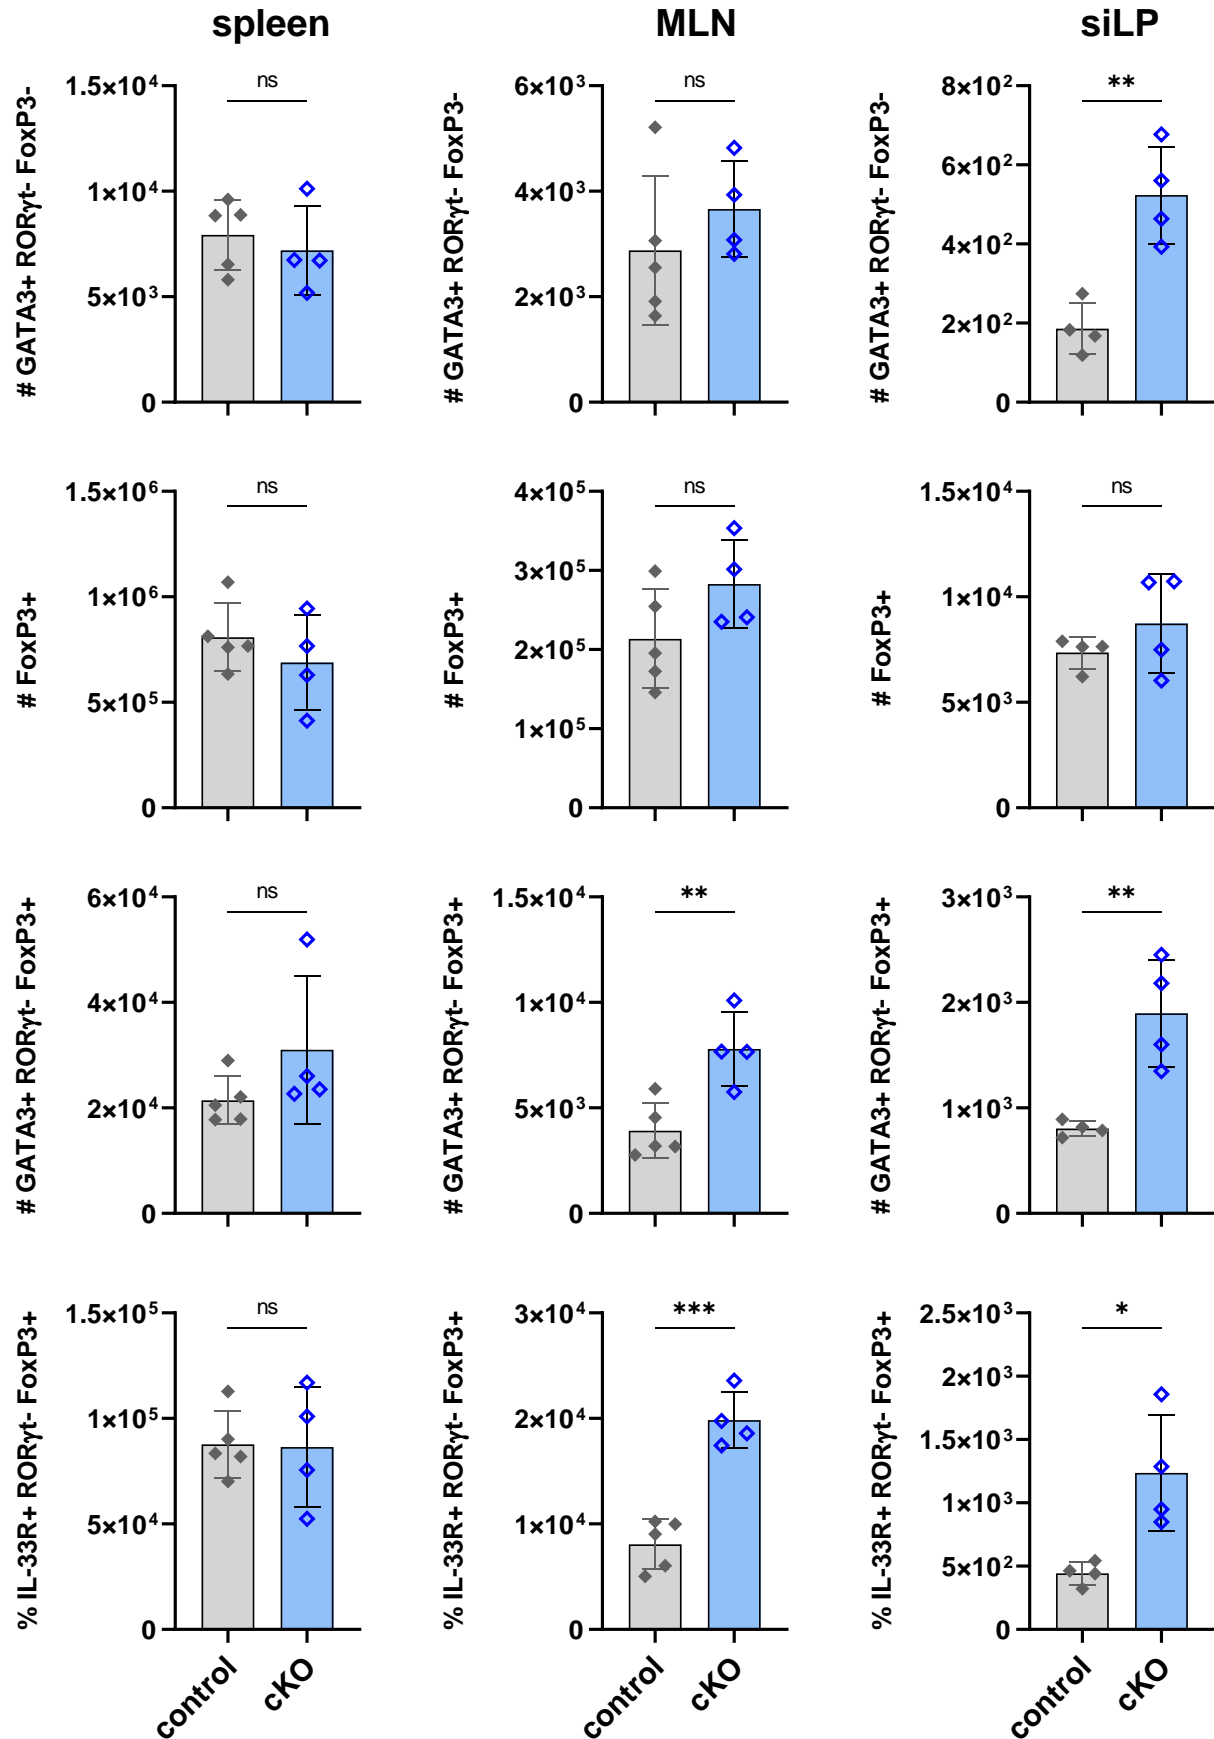

**Figure S4 – Counts of Tregs, GATA3+ Tconv and Tregs, and IL-33R+ Tregs from *Rorc<sup>fl/fl</sup> FoxP3<sup>cre</sup>* cKO and control mice. Related to Figure 2.**

Total cell counts of indicated Treg or Treg subset from *Rorc<sup>+/+</sup> FoxP3<sup>cre</sup>* (control, gray) or *Rorc<sup>fl/fl</sup> FoxP3<sup>cre</sup>* (cKO, blue) mice in spleen, MLN or siLP at steady-state. Data representative of 3 independent experiments. Unpaired t tests were used for statistical analysis.

# Figure S5

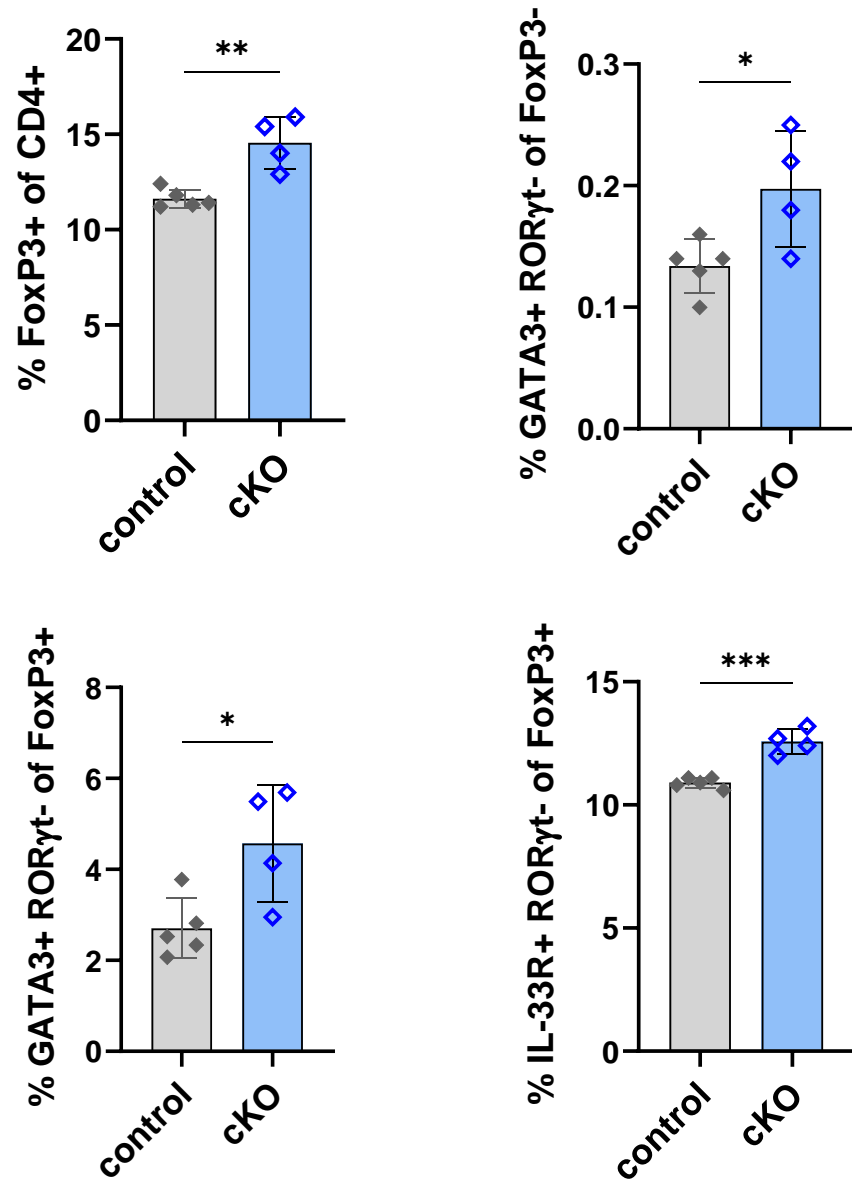

**Figure S5 – Compensatory increase of GATA3+ and IL-33R+ Tregs systemically in mice lacking ROR $\gamma$ t expression in Tregs. Related to Figure 2.**

Frequencies of indicated Treg or Tconv cell from spleens of control or cKO mice. Data representative of 3 independent experiments. Unpaired t tests were used for statistical analysis.

# Figure S6

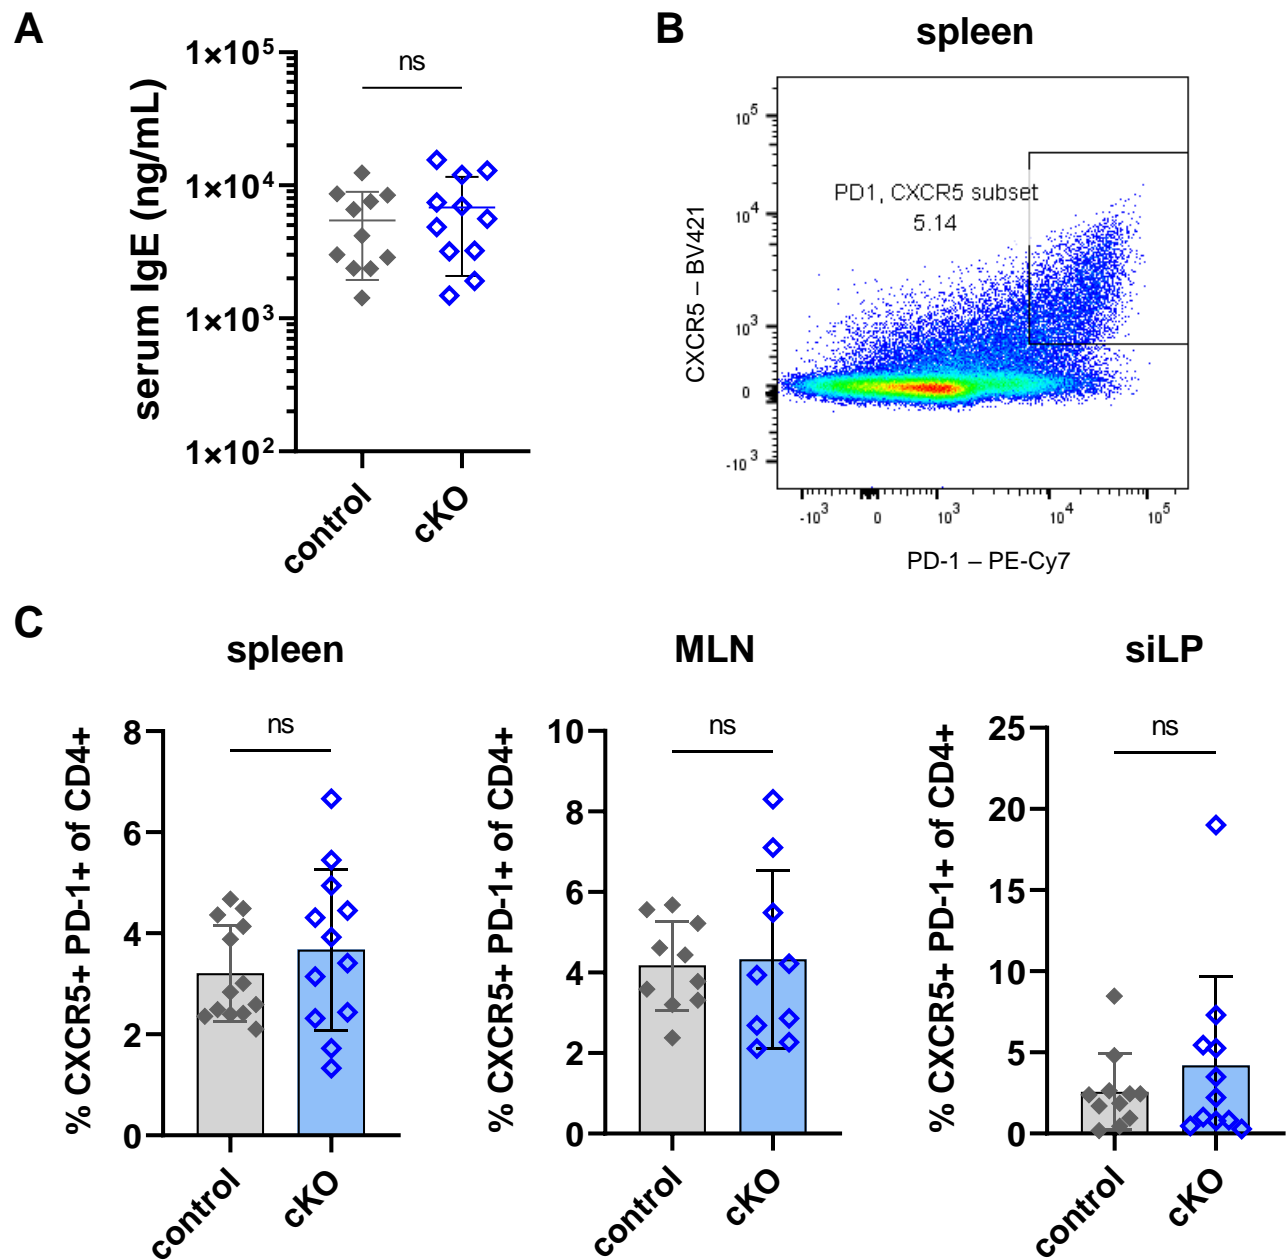

**Figure S6 – Phenotyping of mice lacking ROR $\gamma$ t expression in Tregs: IgE and T<sub>FH</sub> cells. Related to Figure 2.**

Analysis of *Rorc*<sup>+/+</sup> *FoxP3*<sup>cre</sup> (control, gray) or *Rorc*<sup>fl/fl</sup> *FoxP3*<sup>cre</sup> (cKO, blue) mice at steady-state. **A**) Total serum IgE titers at baseline. **B**) Representative gating of CXCR5<sup>+</sup> PD-1<sup>+</sup> T<sub>FH</sub> cells pre-gated on lymphocytes, singlets, live, CD3<sup>+</sup>, CD45<sup>+</sup>, CD4<sup>+</sup>, CD8<sup>-</sup>. **C**) T<sub>FH</sub> frequencies from indicated tissue in cKO or control mice. Data pooled from 3 independent experiments. Unpaired t tests were used for statistical analysis.

# Figure S7

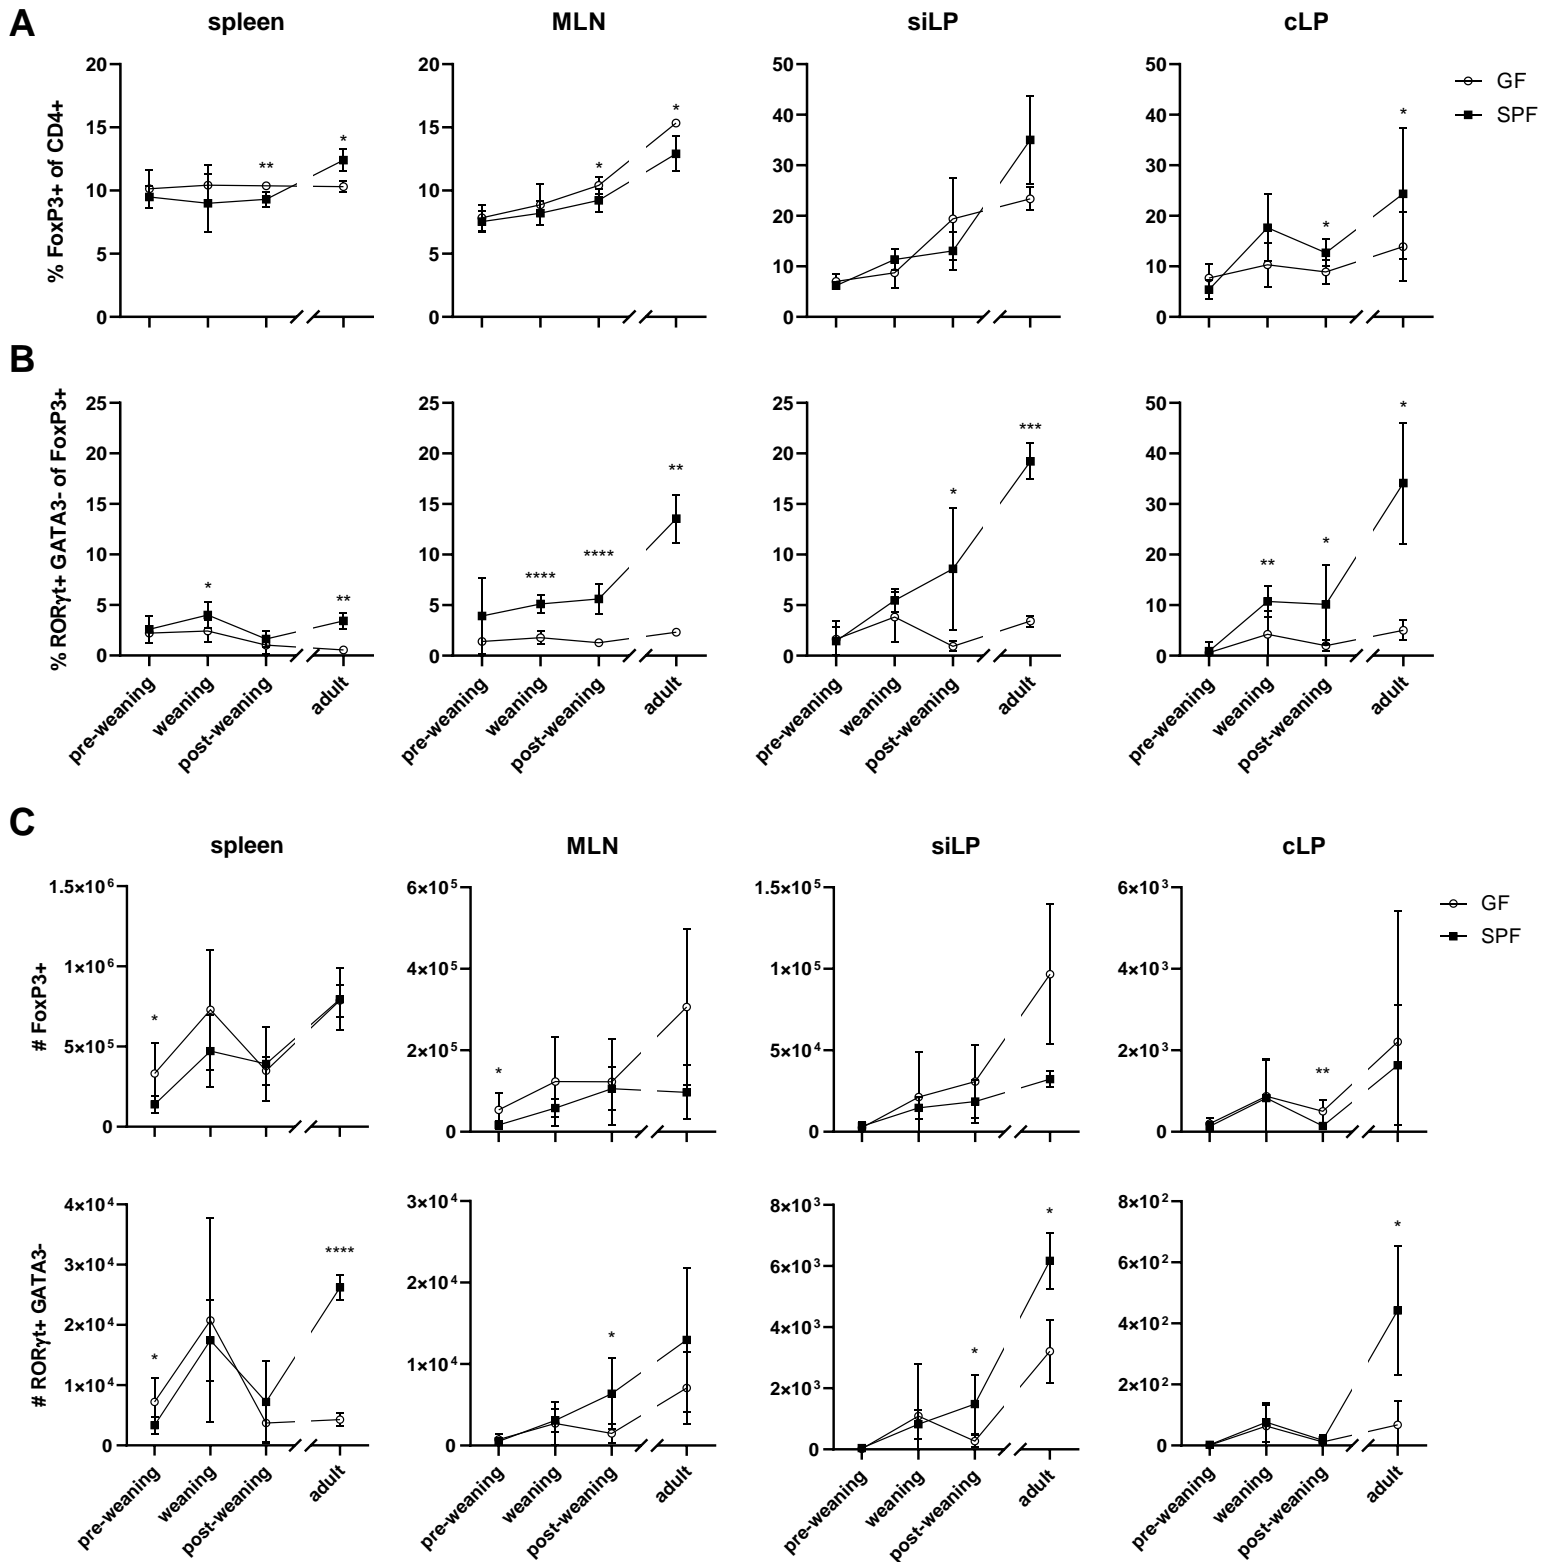

**Figure S7 – GF vs SPF profiling early in life. Related to Figure 4.**

**A)** Frequencies of FoxP3+ Tregs and **B)** RORγt+ Tregs in GF and SPF mice over time in various tissues. **C)** Counts of FoxP3+ Tregs and RORγt+ Tregs corresponding to frequencies reported in Fig. S7A. For time course experiments, data pooled from 10 independent experiments of mice at various ages. n = 5-10 for each group at each timepoint early in life and n = 3 for adult mice.



# Figure S8

**A**

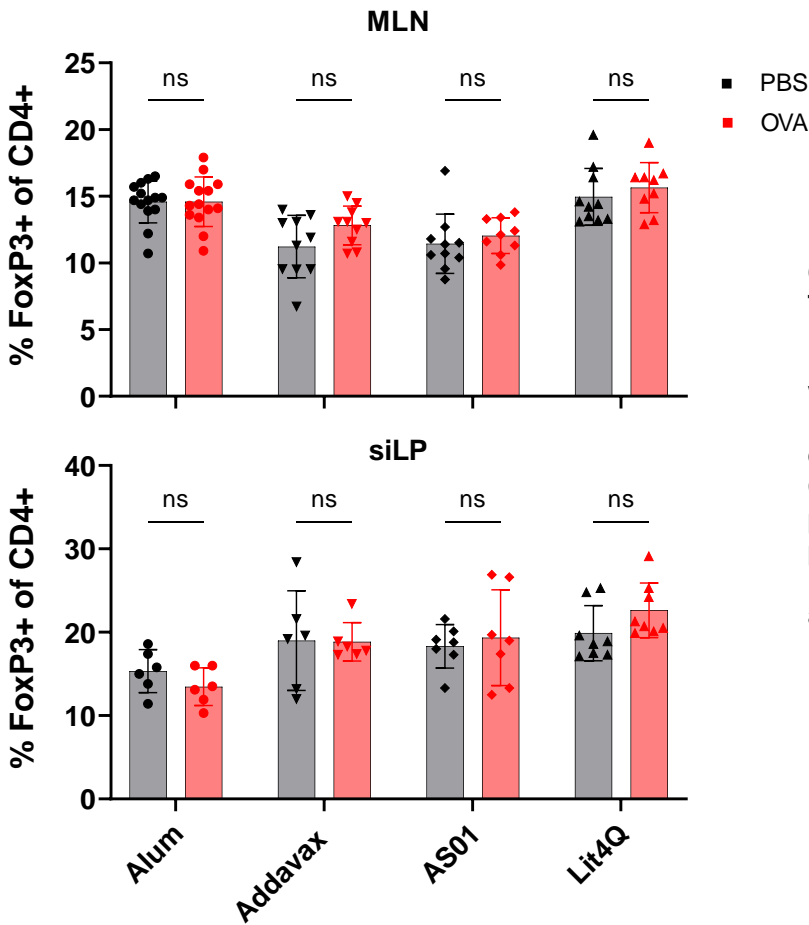

**Figure S8 – No effect of oral exposure to OVA on frequencies of Tregs or ROR $\gamma$ t+ Tregs in MLN and siLP. Related to Figure 5.**

Experimental timeline from Figure 1A was used with various adjuvants. **A)** Frequencies of FoxP3+ Tregs or **B)** ROR $\gamma$ t+ Tregs pre-gated on lymphocytes, singlets, live, CD3+, CD45+, CD4+, CD8- of mice gavaged with OVA or PBS prior to immunization. For each adjuvant, data pooled from 2-3 independent experiments. Unpaired t tests were used for statistical analysis.

**B**

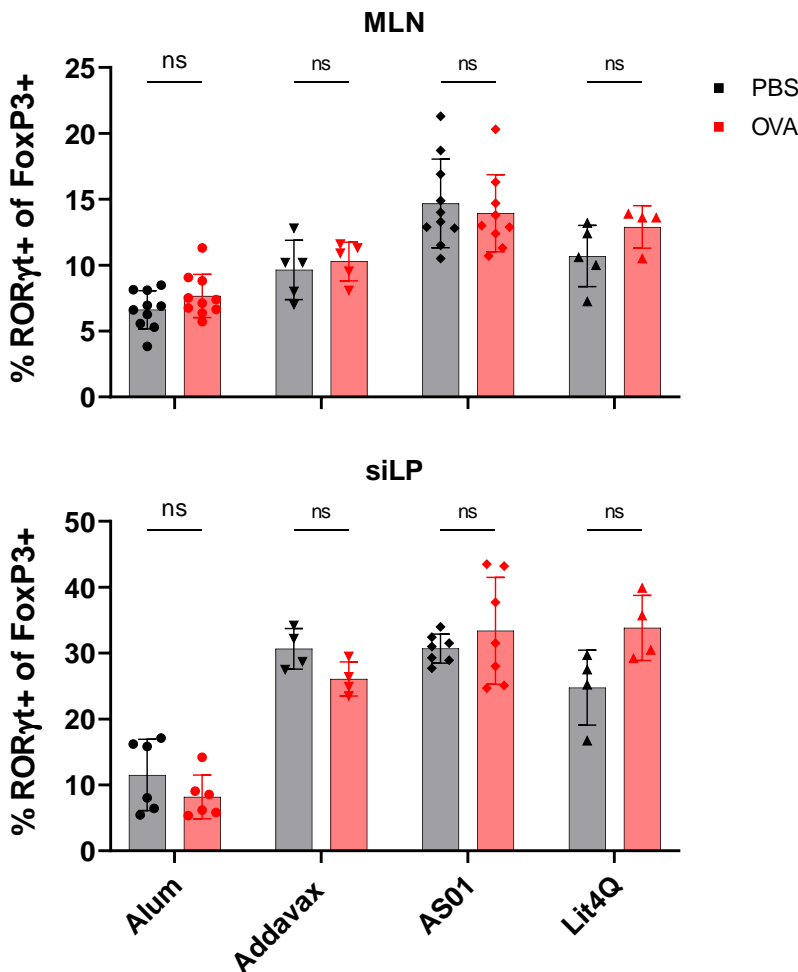

# Figure S9

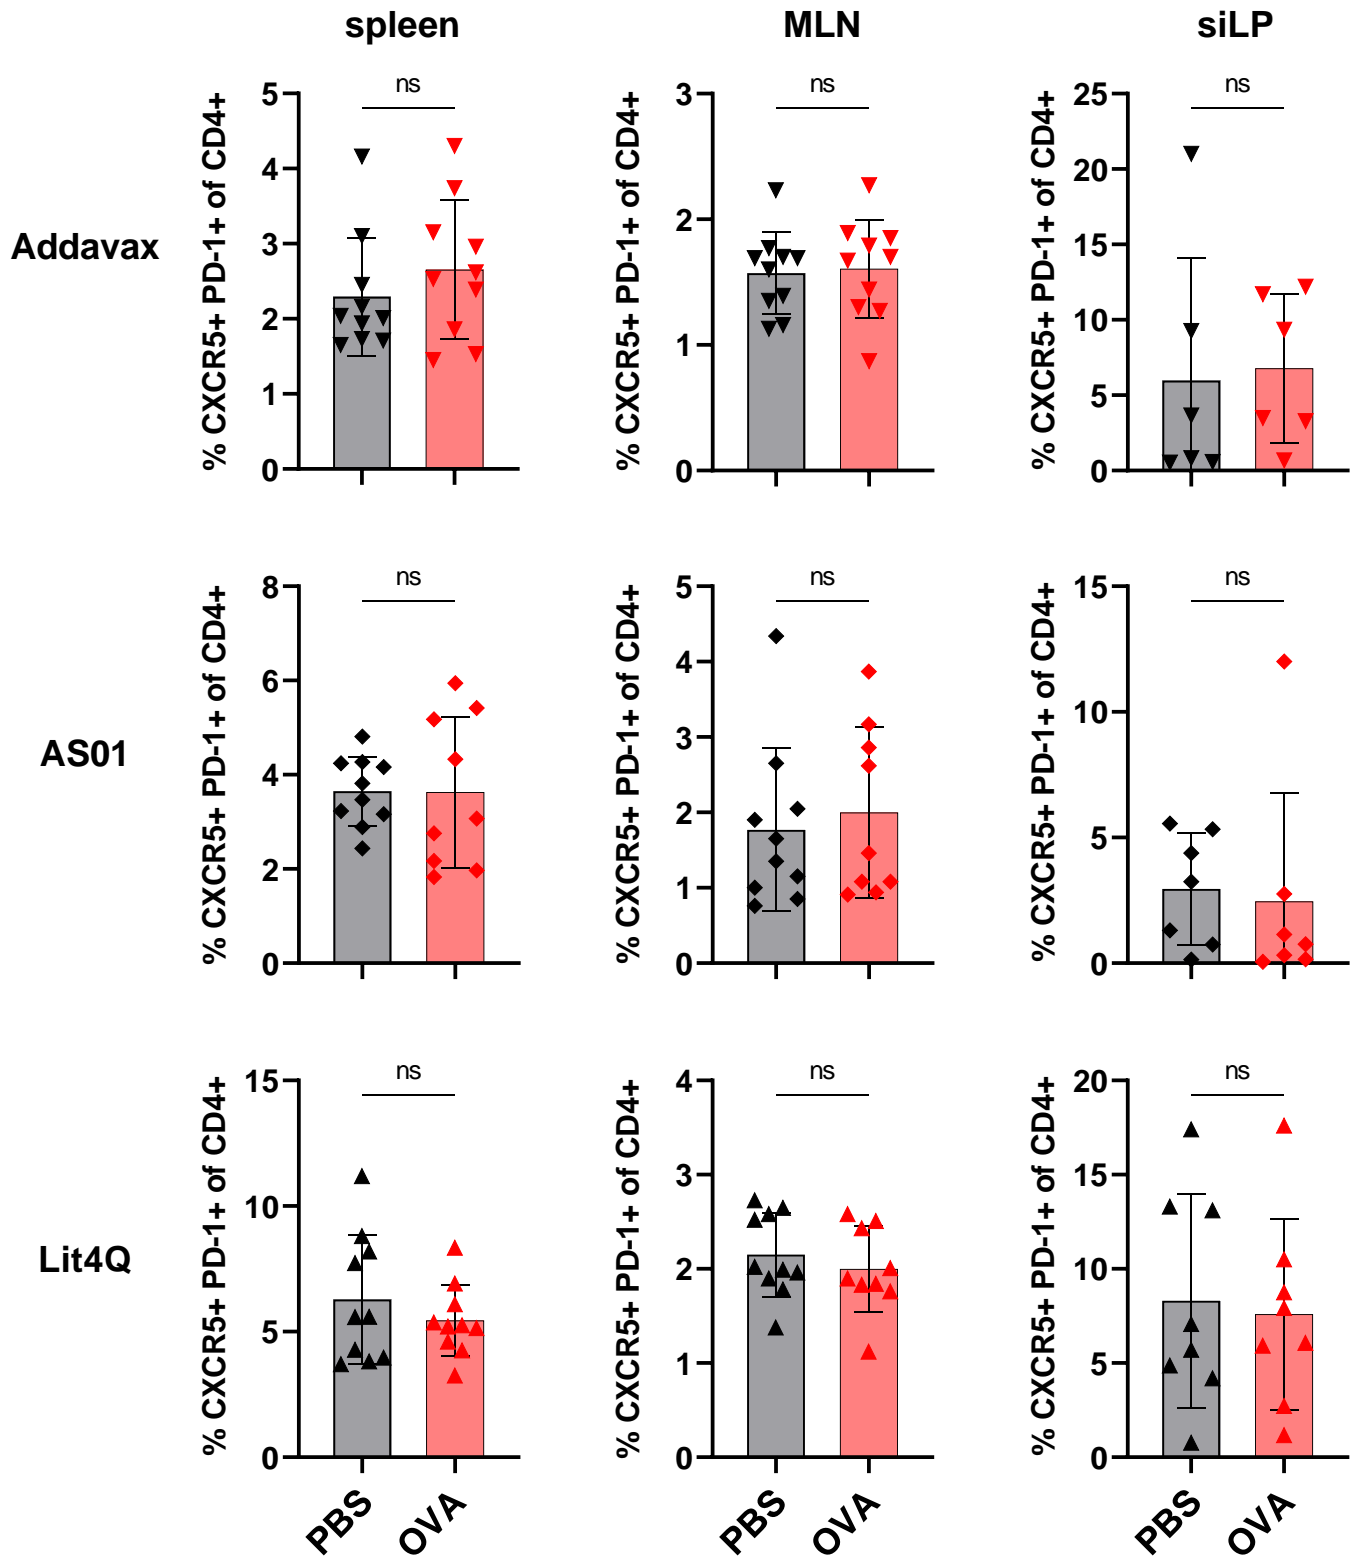

**Figure S9 – T<sub>FH</sub> cells are unchanged between OVA and PBS exposed groups prior to immunization with various adjuvants. Related to Figure 5.**

T<sub>FH</sub> frequencies from indicated tissue from indicated tissue of mice exposed to OVA or PBS prior to immunization with Addavax, AS01 or Lit4Q. of CXCR5+ PD-1+ T<sub>FH</sub> cells pre-gated on lymphocytes, singlets, live, CD3+, CD45+, CD4+, CD8-. For each adjuvant, data pooled from 2 independent experiments. Unpaired t tests were used for statistical analysis.
